# Supplementary material for: The discovery of penta-peptides inhibiting the activity of the formylglycine-generating enzyme and their potential antibacterial effects against Mycobacterium tuberculosis
Source: Royal Society of Chemistry journal article supplement (doi:10.1039/d2ra03379h), 2022-01-01
Supplement: d2ra03379h1.pdf [file d2ra03379h1.pdf]

Supplementary Information

**Discovery of penta-peptides inhibiting activity of formylglycine generating enzyme and its potential antibacterial effect against *Mycobacterium tuberculosis***

Nicholas Asiimwe,<sup>a</sup> Mohammad Faysal Al Mazid,<sup>a</sup> Yong Taek Jeong,<sup>b</sup> Juyong Lee,<sup>c</sup> Jun-Seok Lee<sup>b,\*</sup>

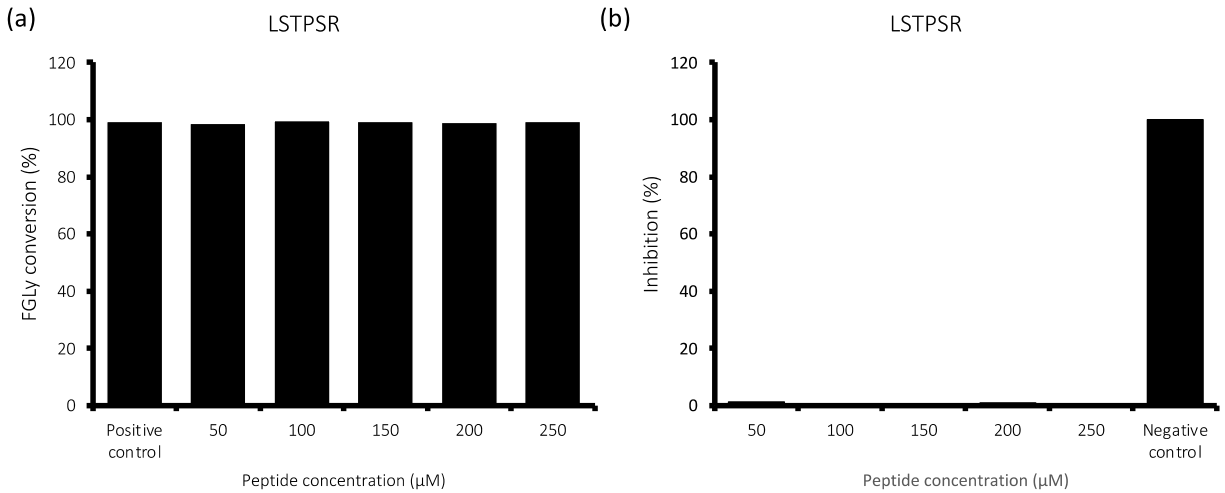

Figure S1. FGE activity inhibition assay upon serial concentration of LSTPSR peptide treatment. Targeted LCMS chromatograms between substrate and fGly product after incubation for 1 hour were used to calculate (a) fGly conversion percentage and (b) activity inhibition percentage.

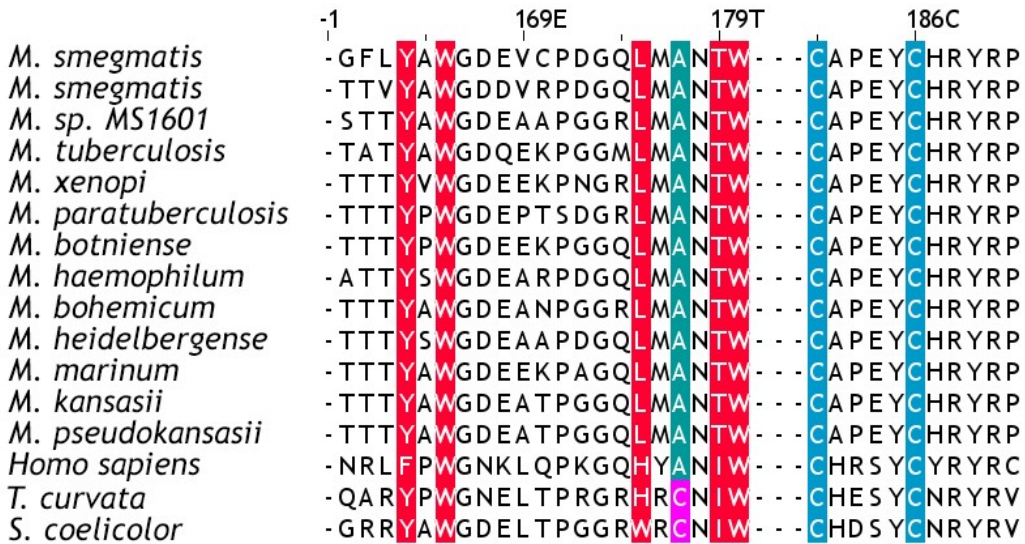

Figure S2. Multiple sequence alignment of FGE from multiple mycobacterium species in comparison with human, T Thermomonospora curvata and Streptomyces coelicolor. Conserved small hydrophobic subdomain containing a buried alanine (pink) which is substituted for cysteine (pink)

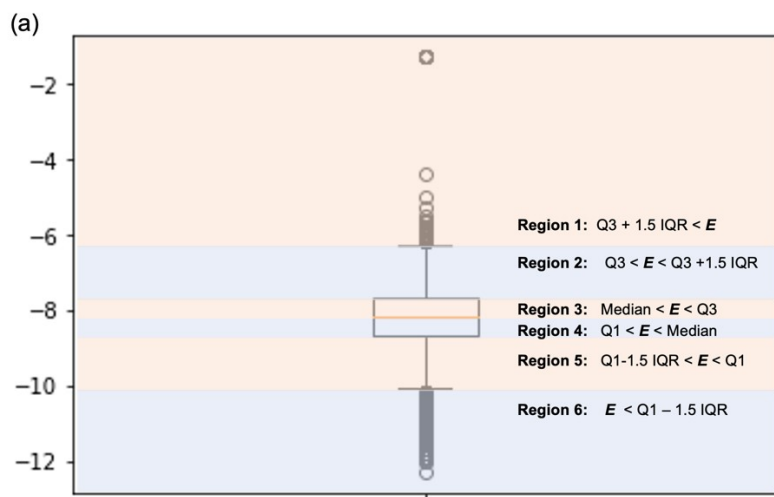

(b)

| Region 1 | Region 2 | Region 3 | Region 4 | Region 5 | Region 6 |
|----------|----------|----------|----------|----------|----------|
| SMMMC    | GWTME    | GWTRS    | GWTQK    | SGWWW    | TYWWW    |
| SCGMM    | GHGGE    | GWTSK    | GHGGP    | GYWWW    | GPWYW    |
| SSCCC    | SSCMC    |          |          |          | GWWPW    |
|          | DGACA    |          |          |          | SPWWW    |
|          | TPKEK    |          |          |          | SWWPW    |
|          | TSCKM    |          |          |          |          |

Figure S3. (a) Boxplot of docking energies of penta-peptide ligand (xXXXX: where x: CDEHKLMPQRY, X: any amino acids). (b) Re-sampled and selected peptide belong into the statistical distribution for *in vitro* FGE activity inhibition assay. Inter-Quantile Range (IQR) is distance between upper and lower quantile ( $\text{IQR} = Q3 - Q1$ )

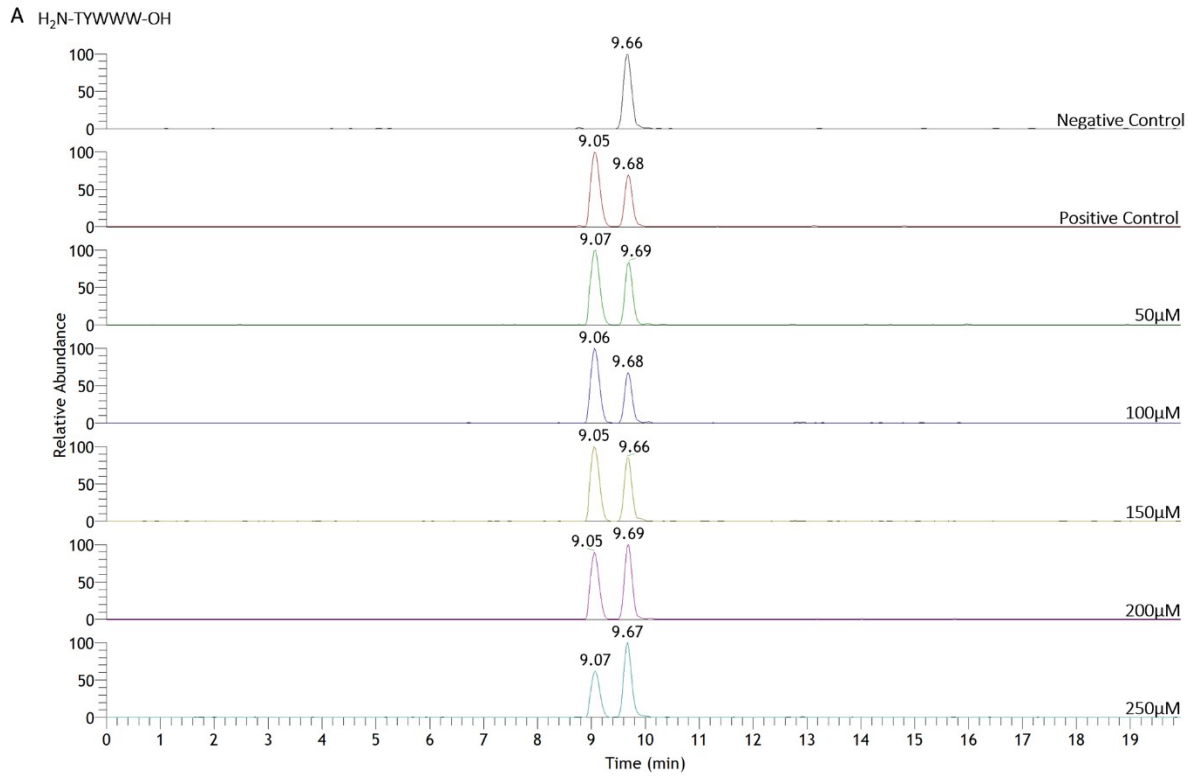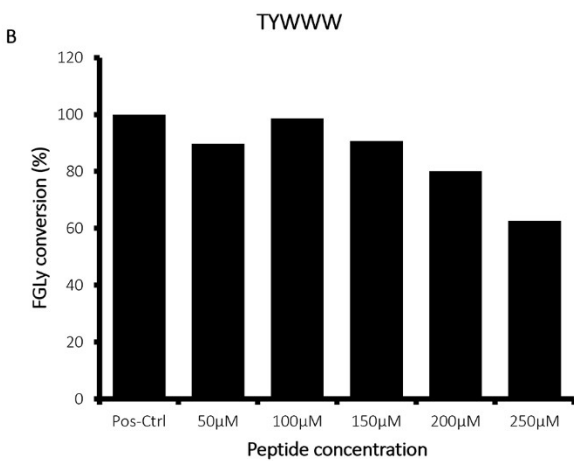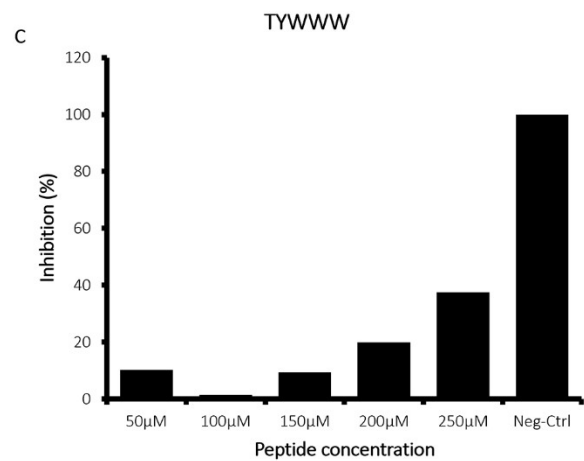

Figure S4. MS-chromatogram profile FGE activity in the presence of various TYWWW concentrations. The peptide inhibitor was neither N-terminal acetylated nor C-terminal amidated and the reaction contained 200µM native enzyme substrate.

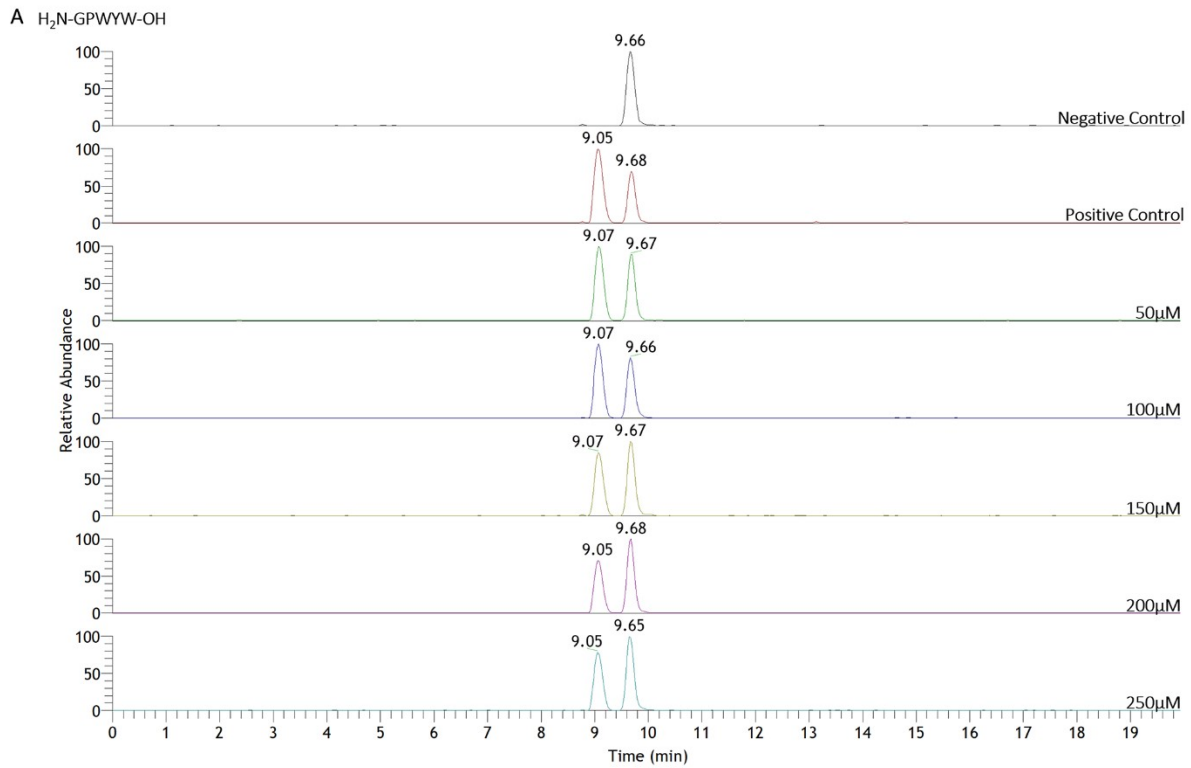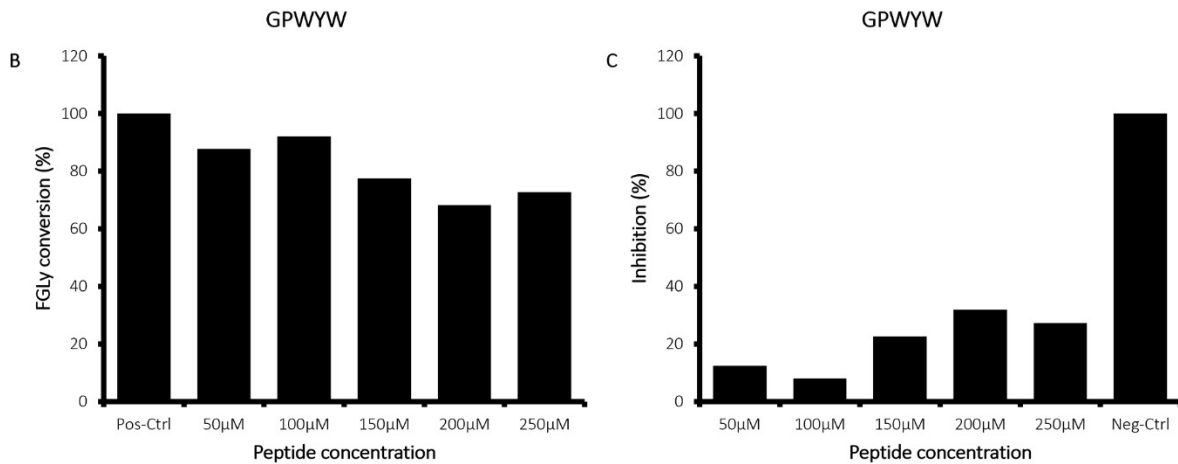

Figure S5. MS-chromatogram profile FGE activity in the presence of various GPWYW concentrations. The peptide inhibitor was neither N-terminal acetylated nor C-terminal amidated and the reaction contained 200µM native enzyme substrate.

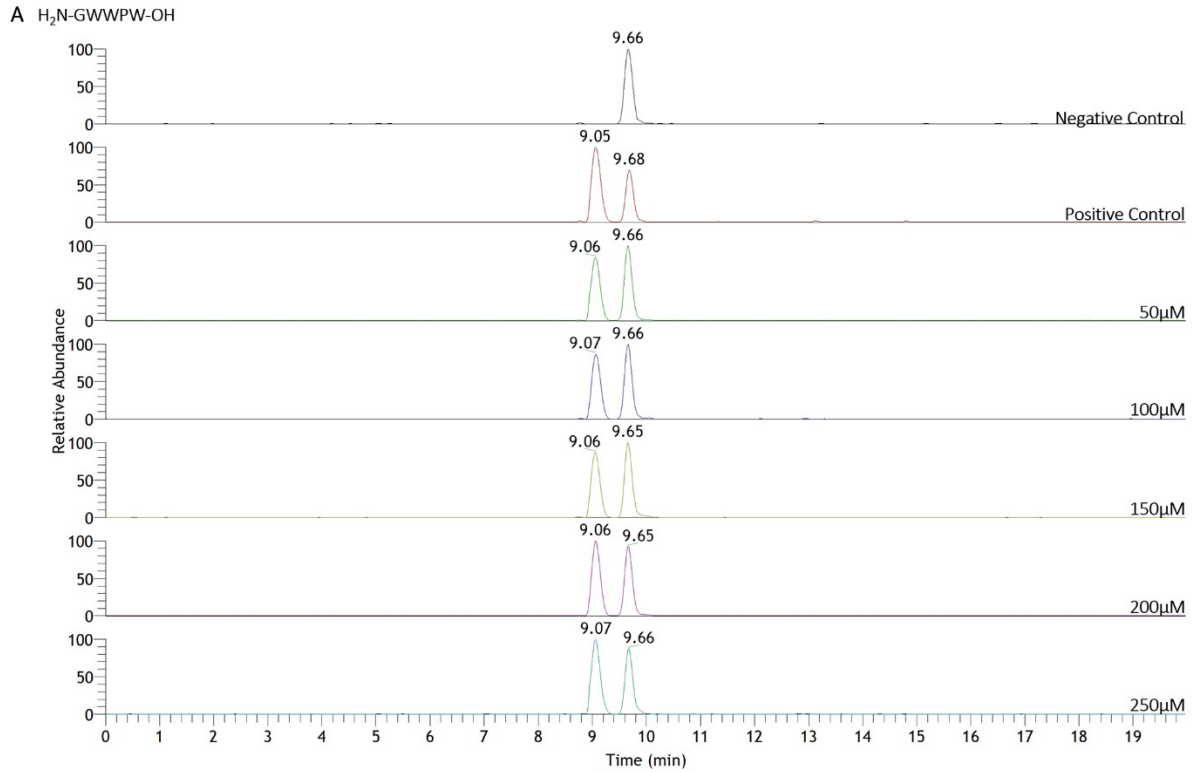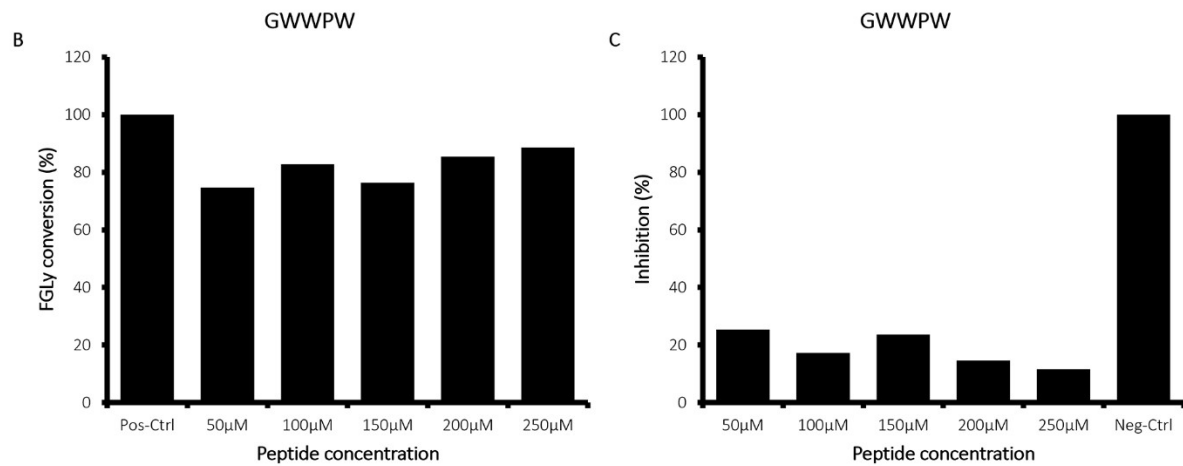

Figure S6. MS-chromatogram profile FGE activity in the presence of various GWWPW concentrations. The peptide inhibitor was neither N-terminal acetylated nor C-terminal amidated and the reaction contained 200µM native enzyme substrate.

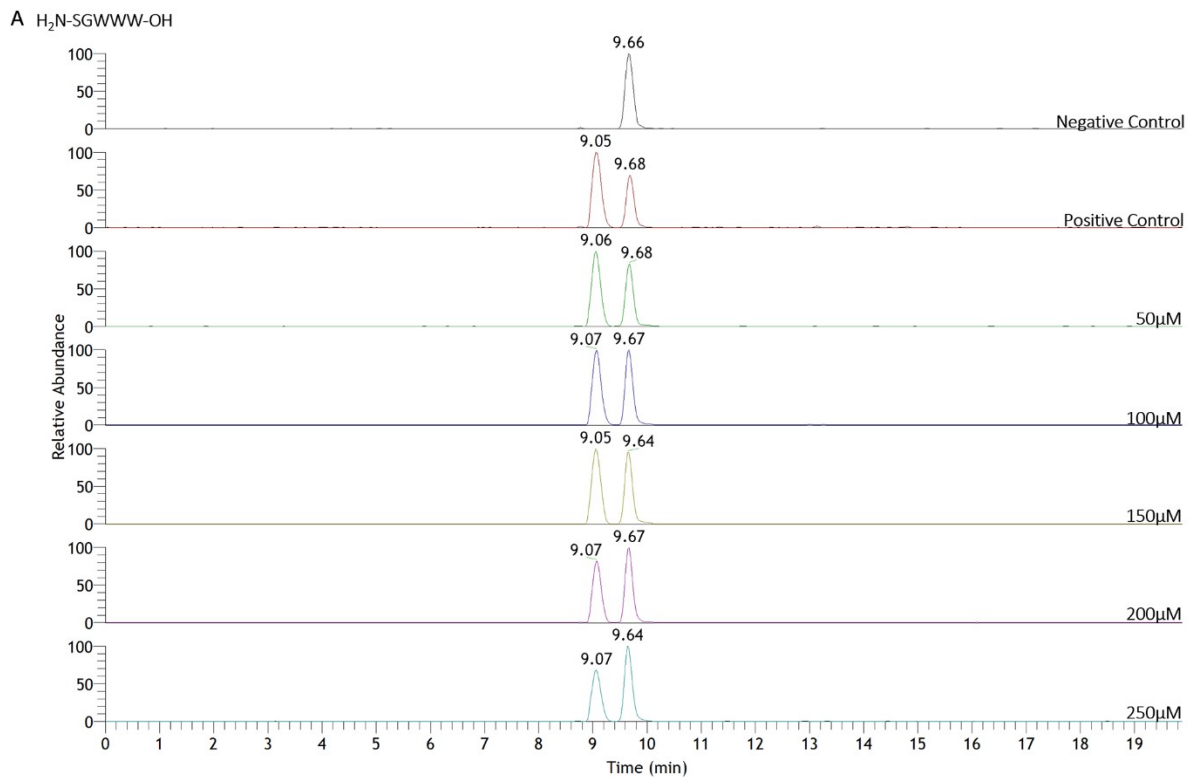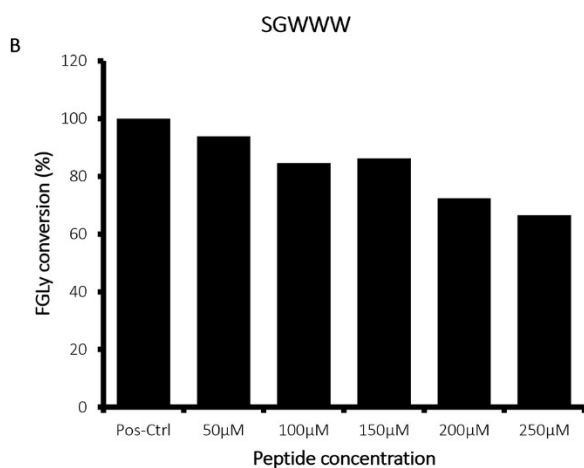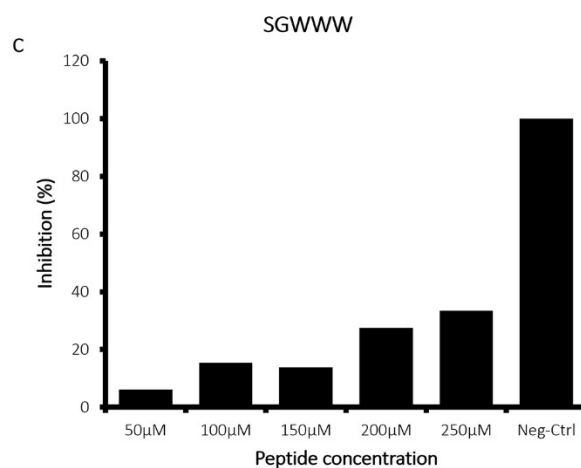

Figure S7. MS-chromatogram profile FGE activity in the presence of various SGWWW concentrations. The peptide inhibitor was neither N-terminal acetylated nor C-terminal amidated and the reaction contained 200µM native enzyme substrate.

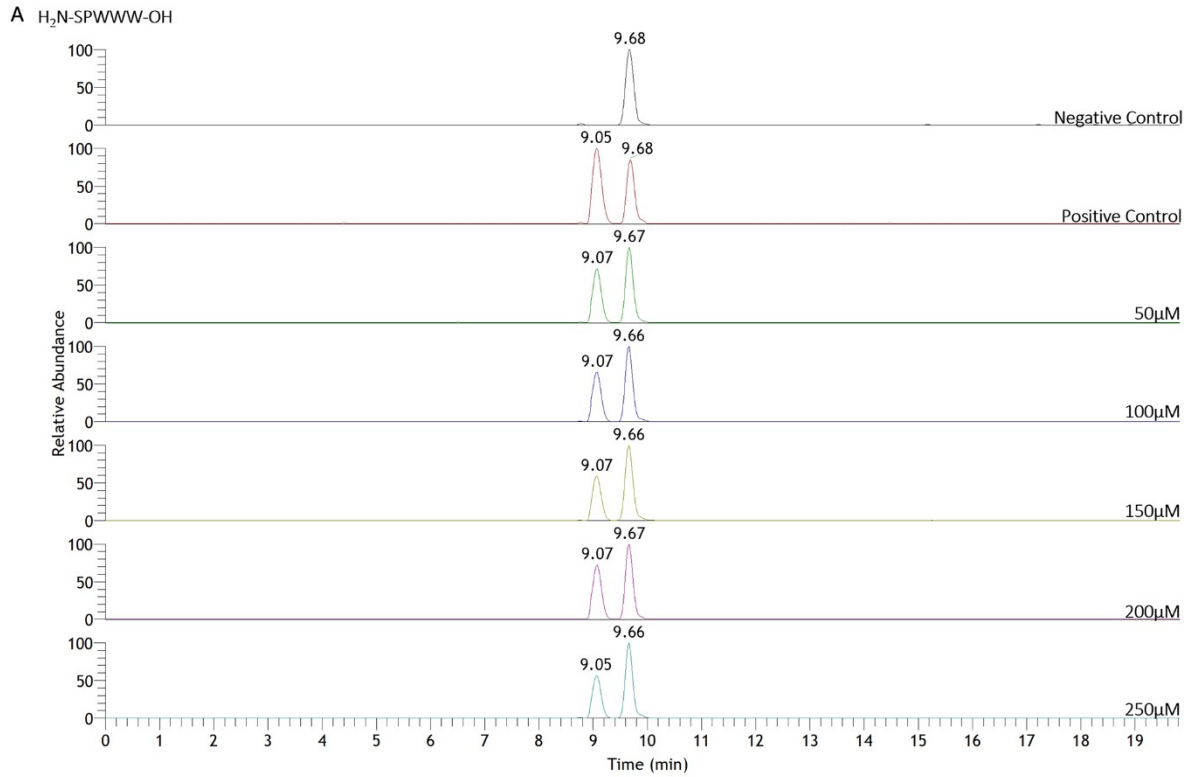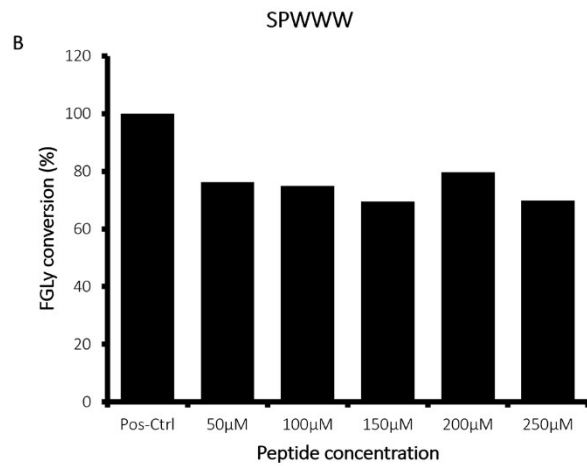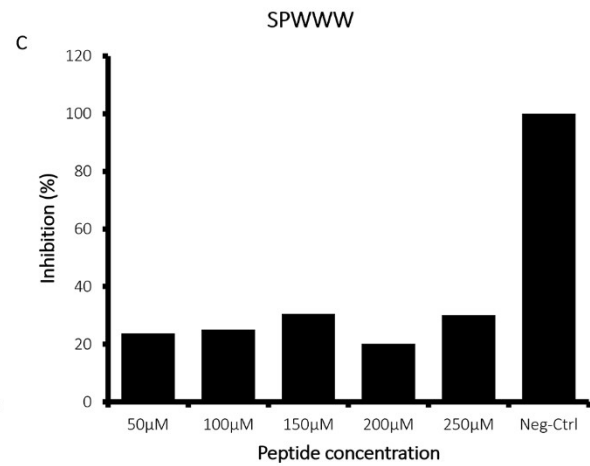

Figure S8. MS-chromatogram profile FGE activity in the presence of various SPWWW concentrations. The peptide inhibitor was neither N-terminal acetylated nor C-terminal amidated and the reaction contained 200µM native enzyme substrate.



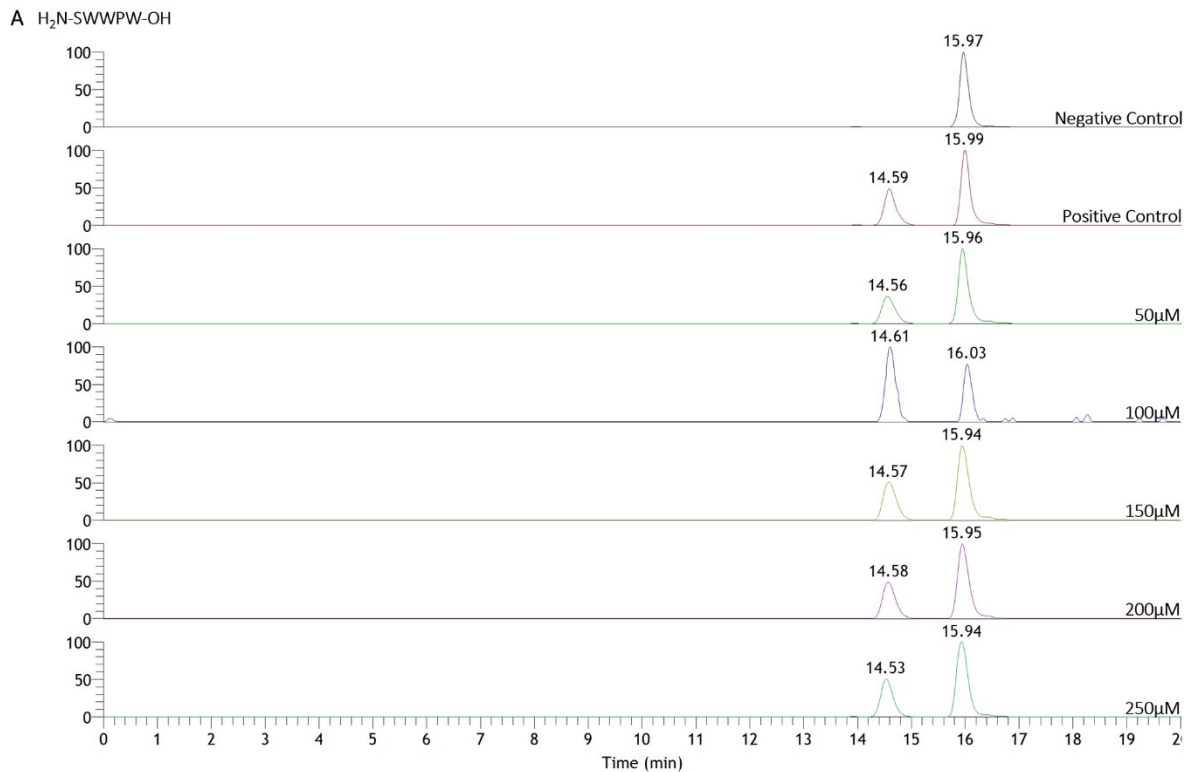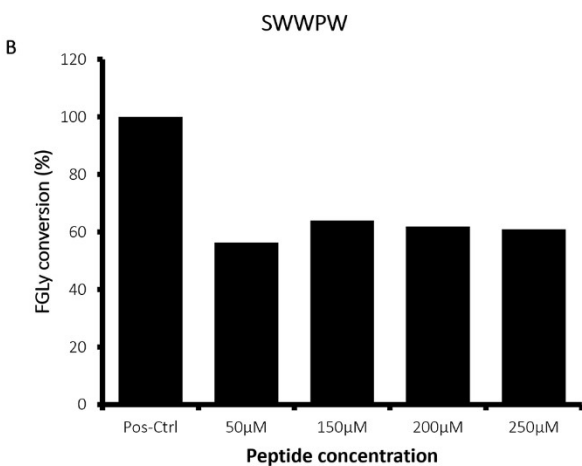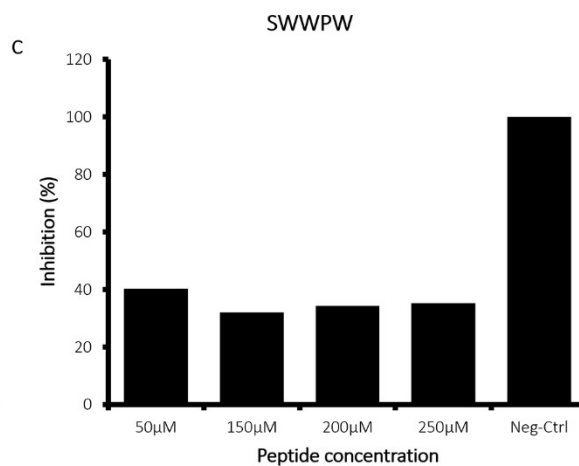

Figure S9. MS-chromatogram profile FGE activity in the presence of various SWWPW concentrations. The peptide inhibitor was neither N-terminal acetylated nor C-terminal amidated and the reaction contained 200µM native enzyme substrate.

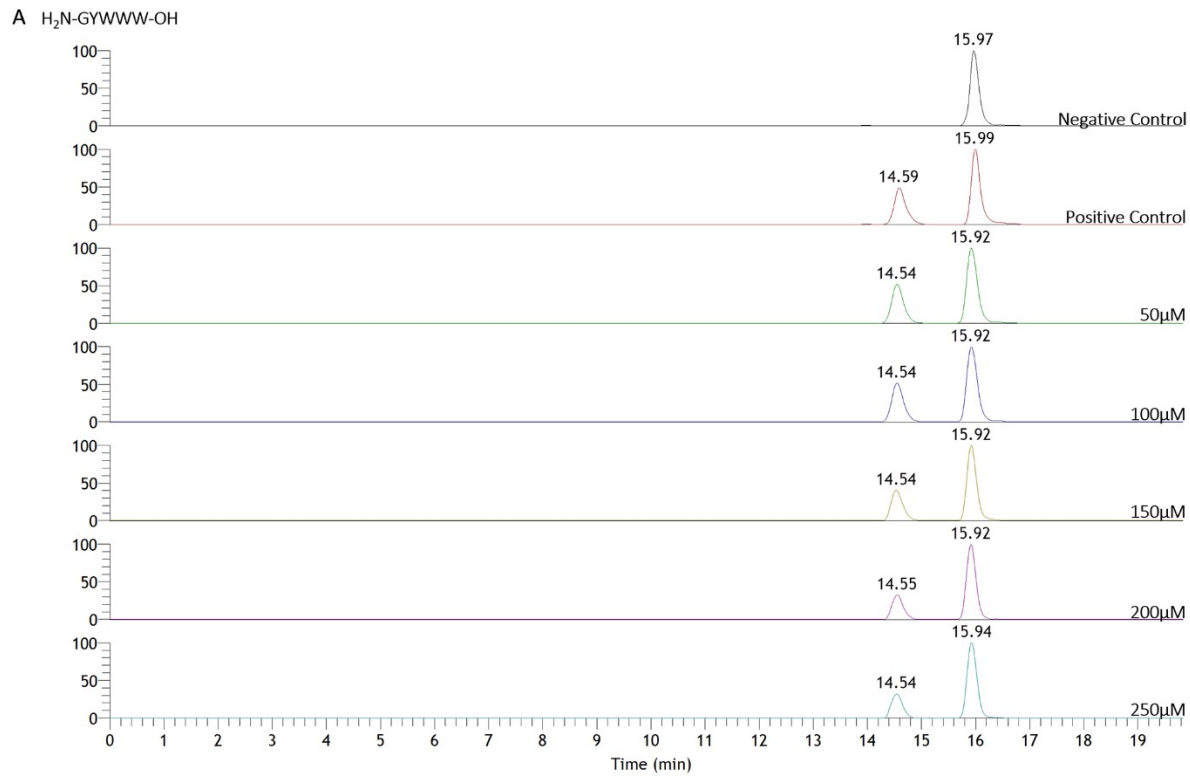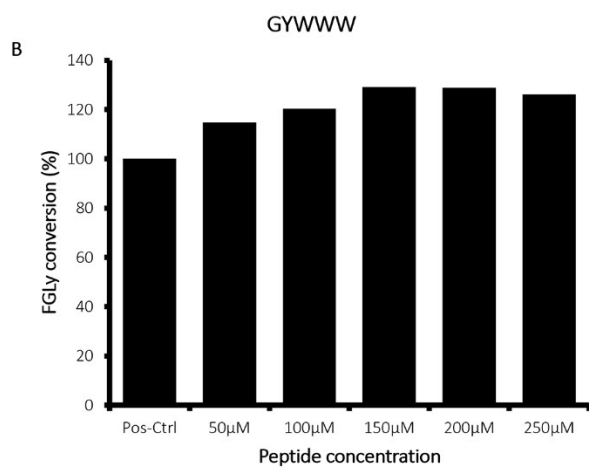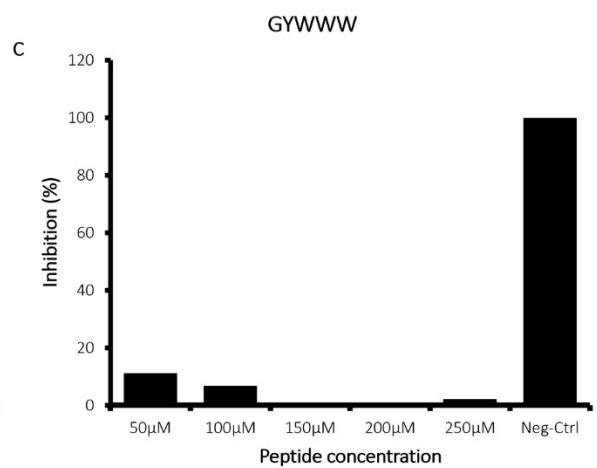

Figure S10. MS-chromatogram profile FGE activity in the presence of various GYWWW concentrations. The peptide inhibitor was neither N-terminal acetylated nor C-terminal amidated and the reaction contained 200 μM native enzyme substrate.

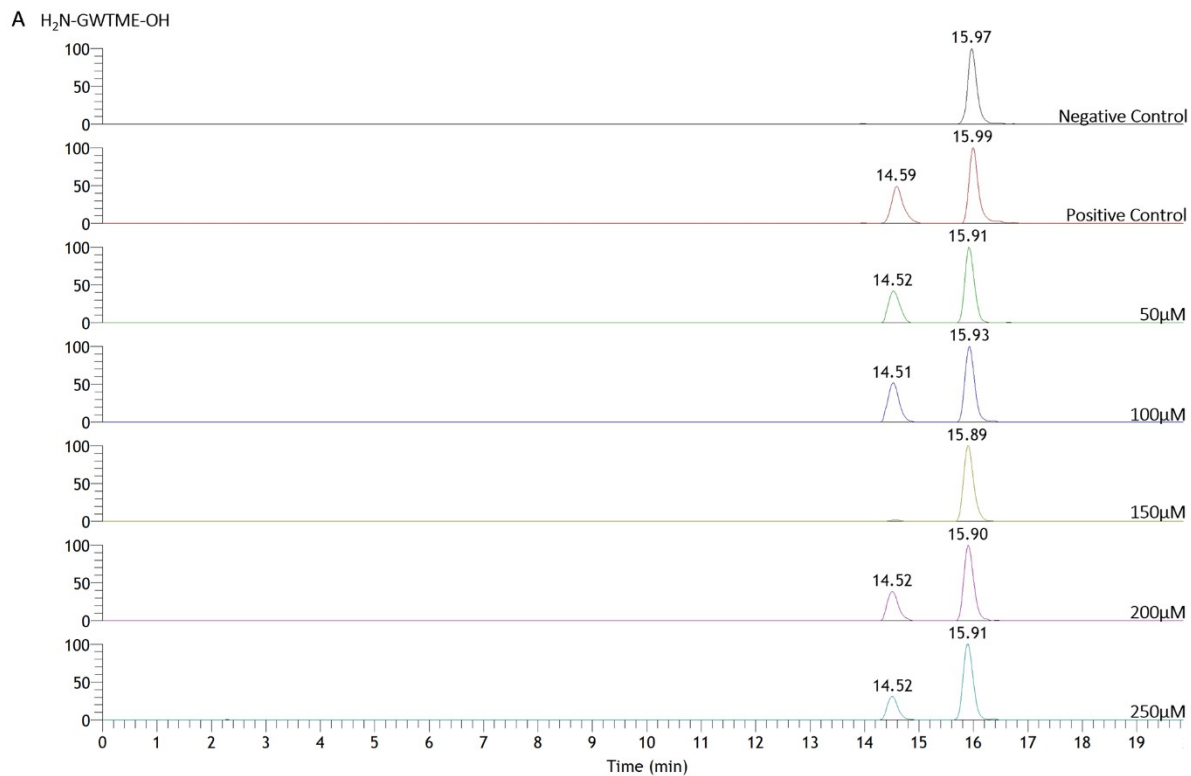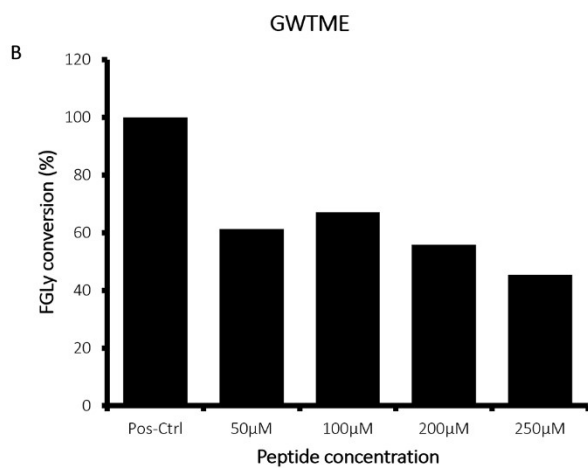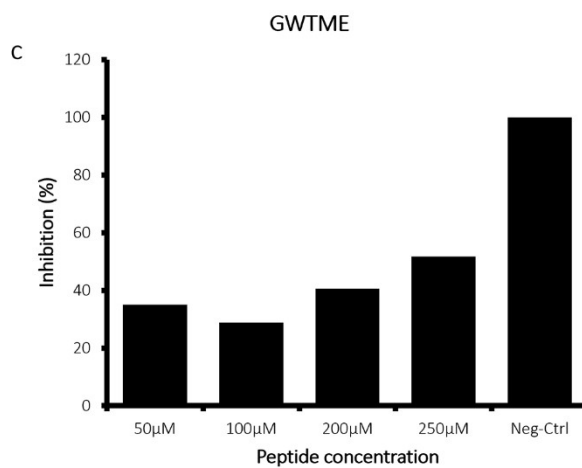

Figure S11. MS-chromatogram profile FGE activity in the presence of various GWTME concentrations. The peptide inhibitor was neither N-terminal acetylated nor C-terminal amidated and the reaction contained 200µM native enzyme substrate.

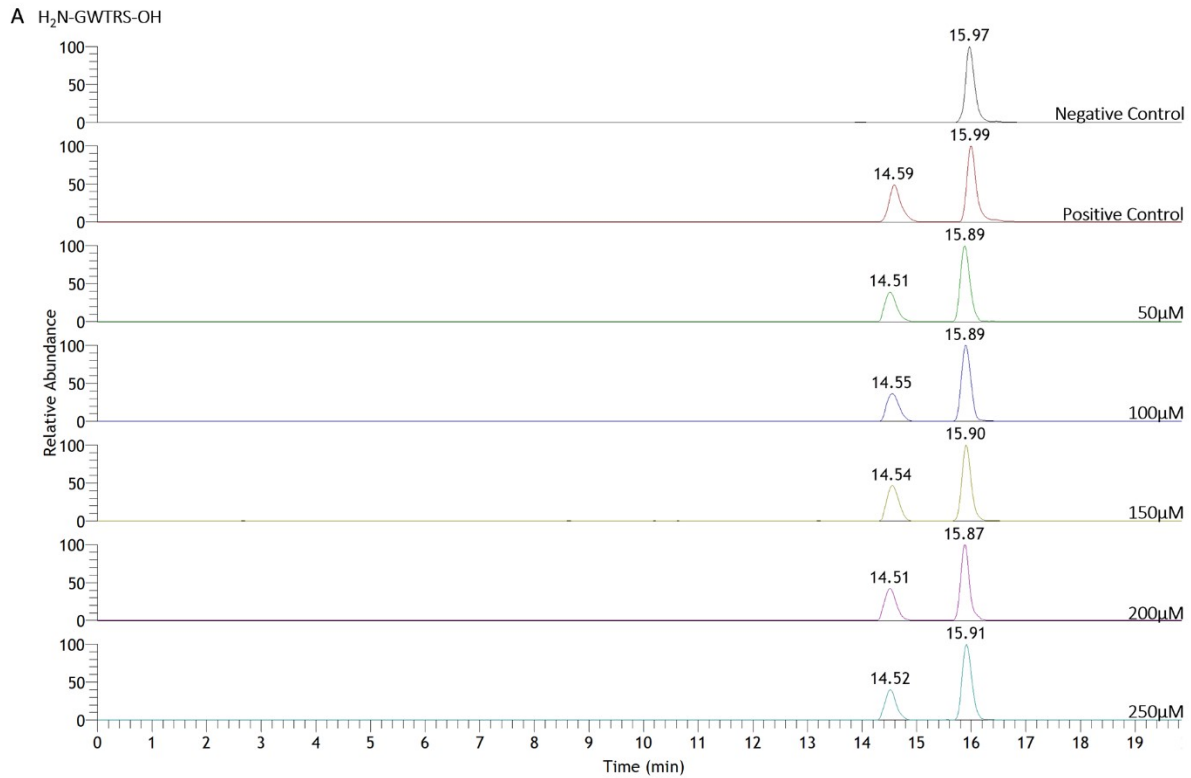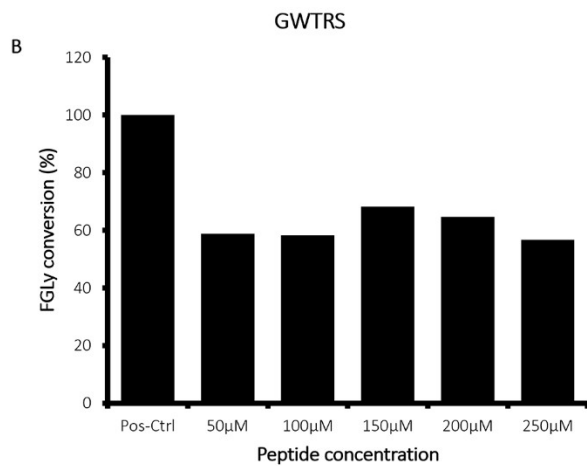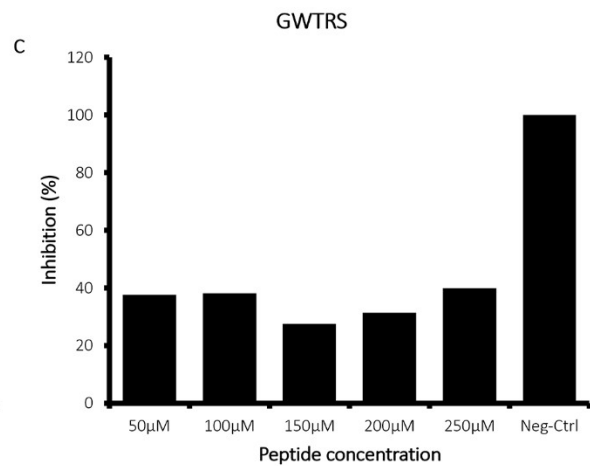

Figure S12. MS-chromatogram profile FGE activity in the presence of various GWTRS concentrations. The peptide inhibitor was neither N-terminal acetylated nor C-terminal amidated and the reaction contained 200µM native enzyme substrate.

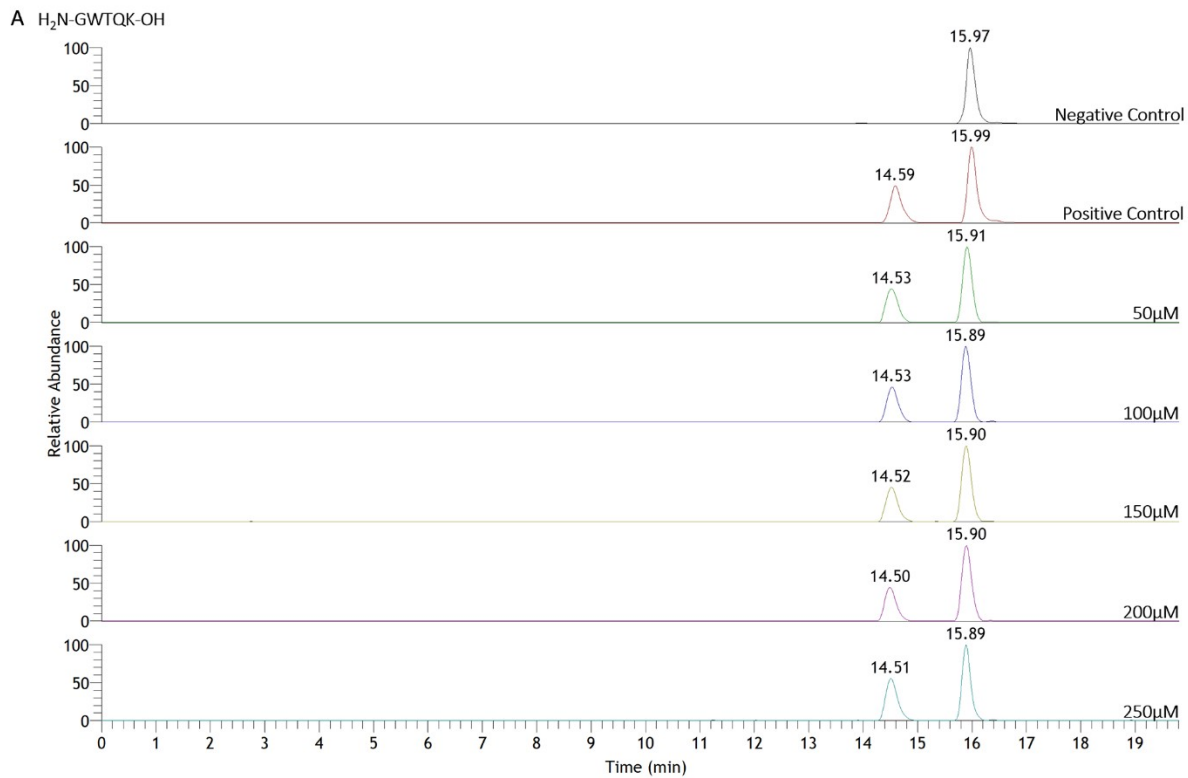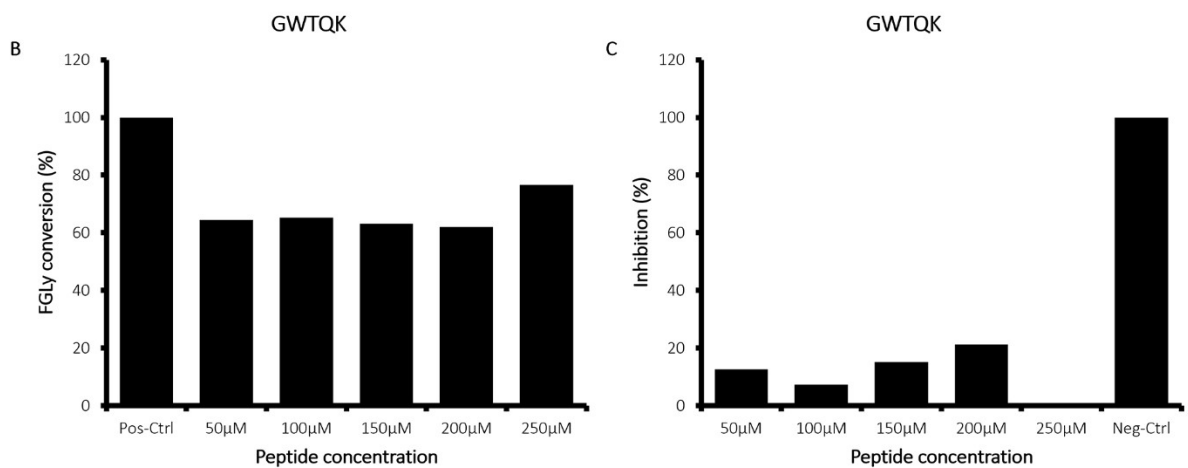

Figure S13. MS-chromatogram profile FGE activity in the presence of various GWTQK concentrations. The peptide inhibitor was neither N-terminal acetylated nor C-terminal amidated and the reaction contained 200µM native enzyme substrate.

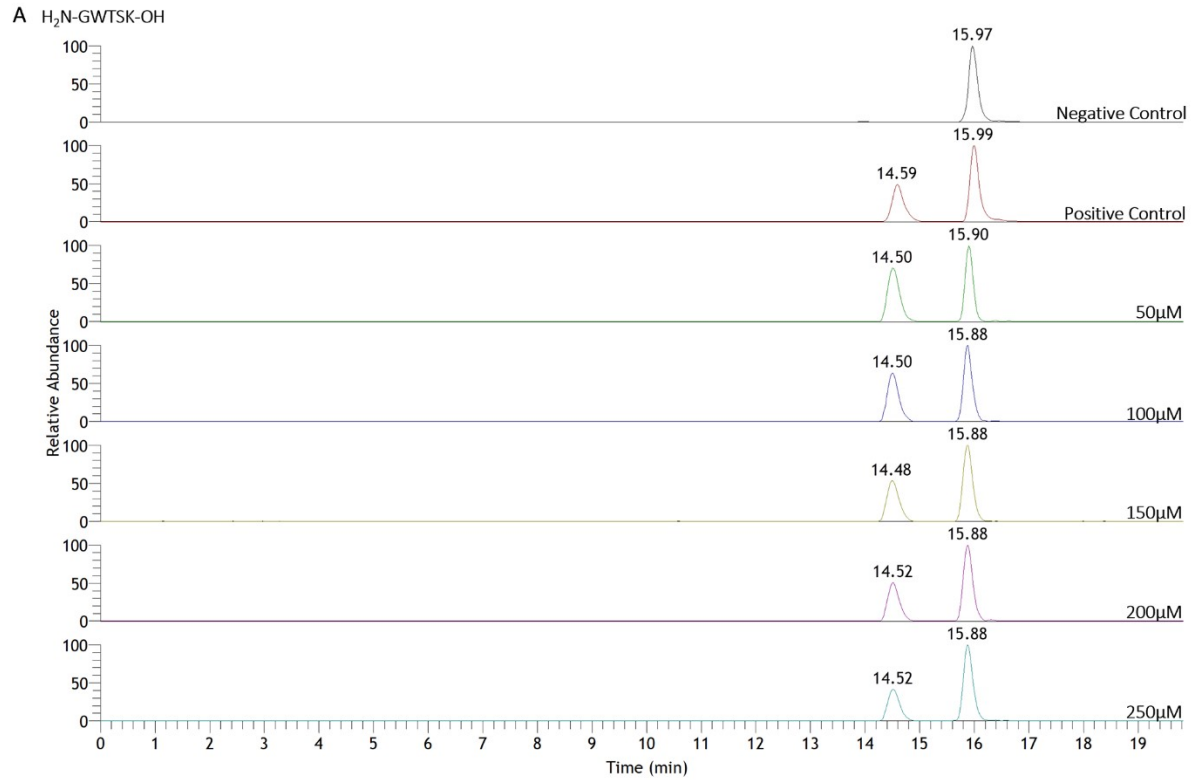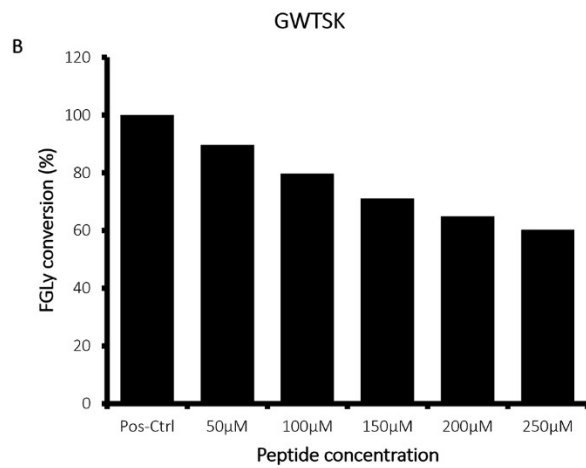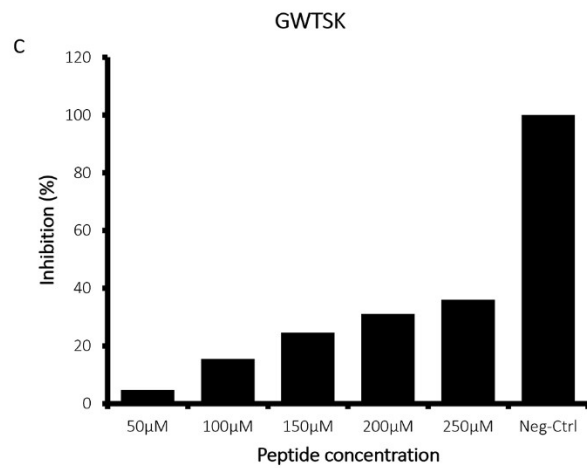

Figure S14. MS-chromatogram profile FGE activity in the presence of various GWTSK concentrations. The peptide inhibitor was neither N-terminal acetylated nor C-terminal amidated and the reaction contained 200µM native enzyme substrate.

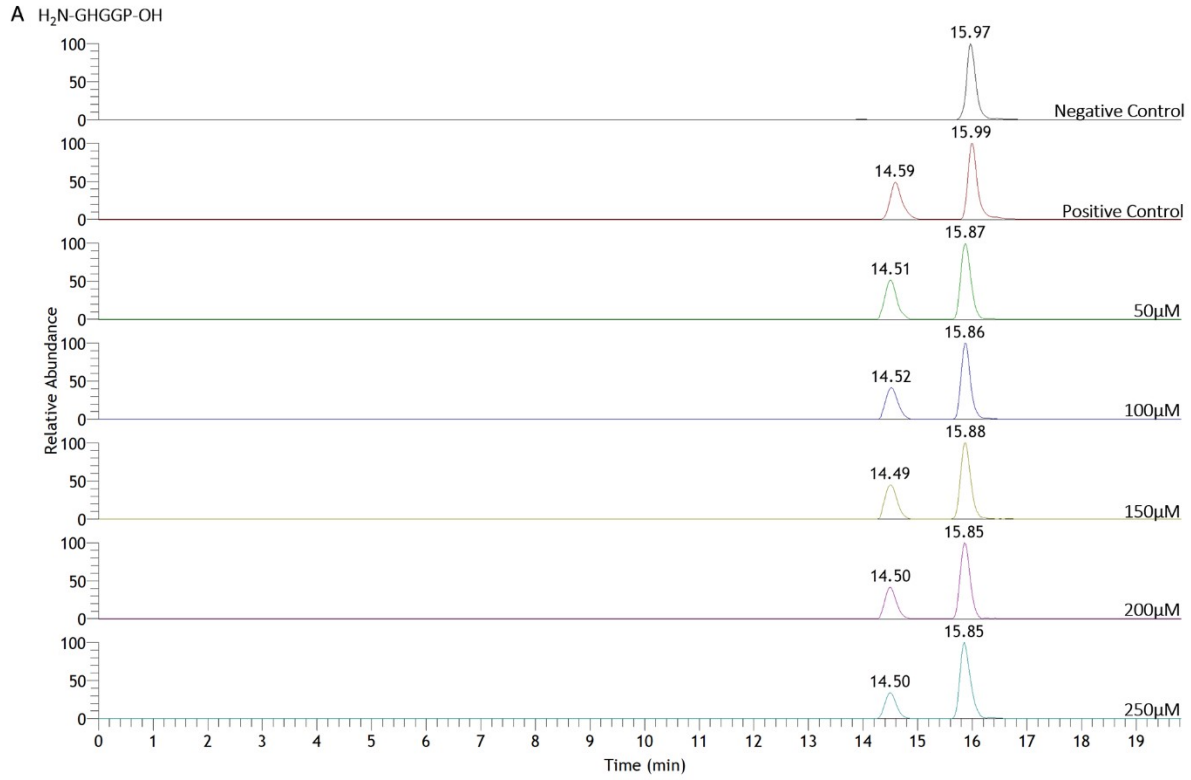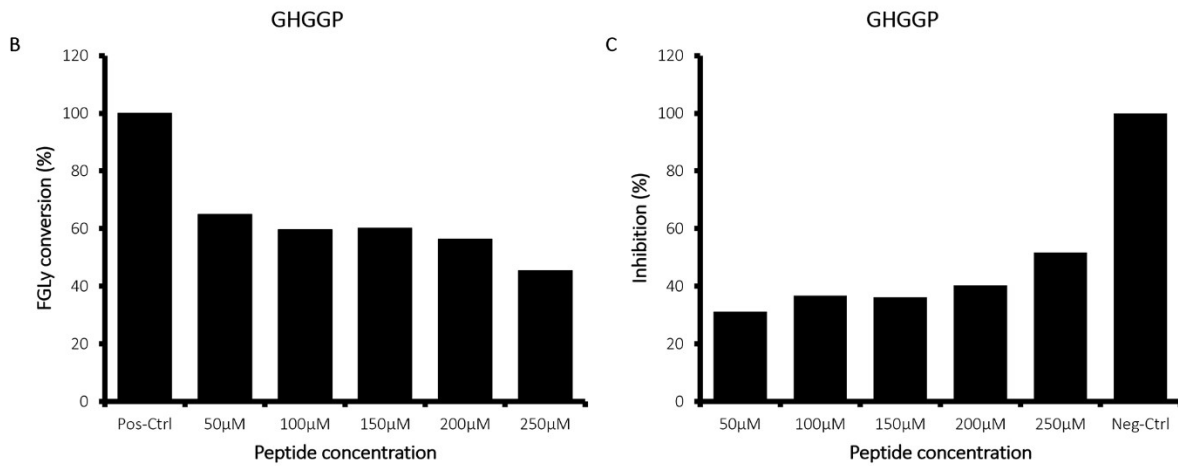

Figure S15. MS-chromatogram profile FGE activity in the presence of various GHGGP concentrations. The peptide inhibitor was neither N-terminal acetylated nor C-terminal amidated and the reaction contained 200µM native enzyme substrate.

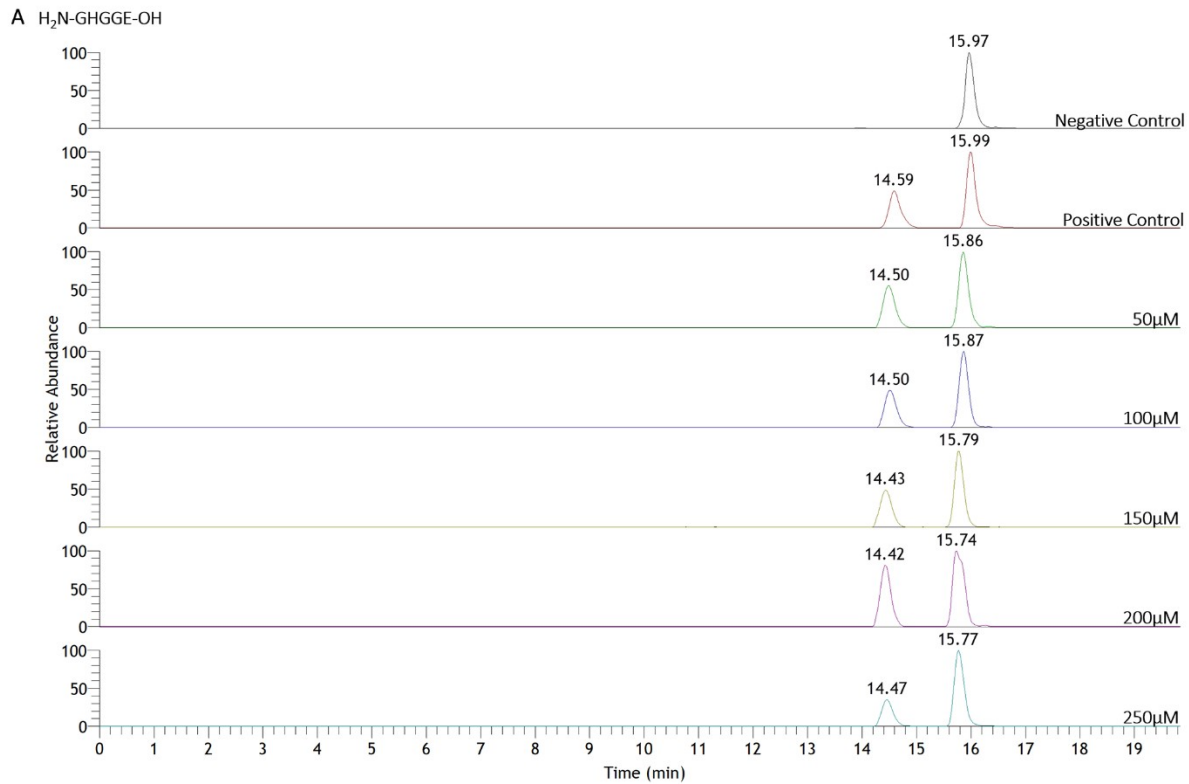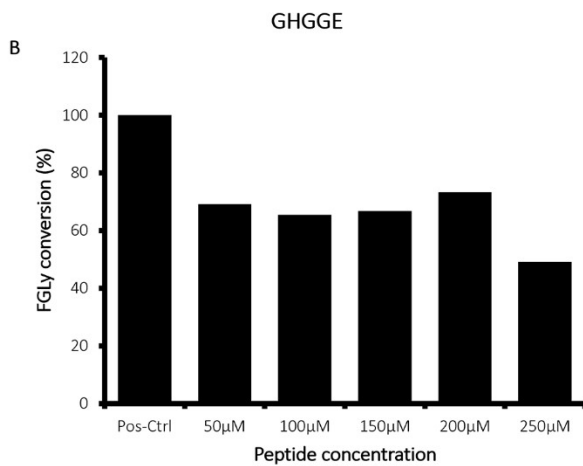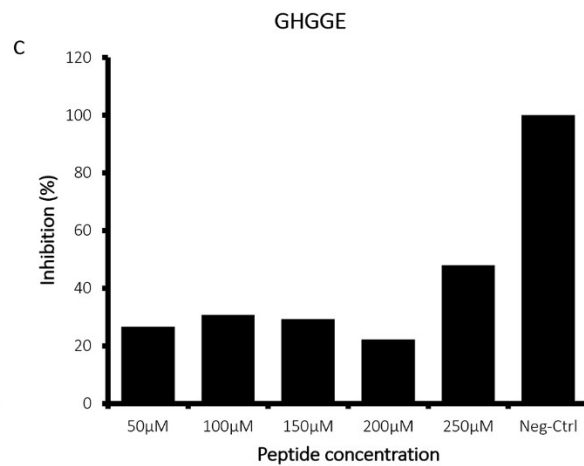

Figure S16. MS-chromatogram profile FGE activity in the presence of various GHGGE concentrations. The peptide inhibitor was neither N-terminal acetylated nor C-terminal amidated and the reaction contained 200µM native enzyme substrate.



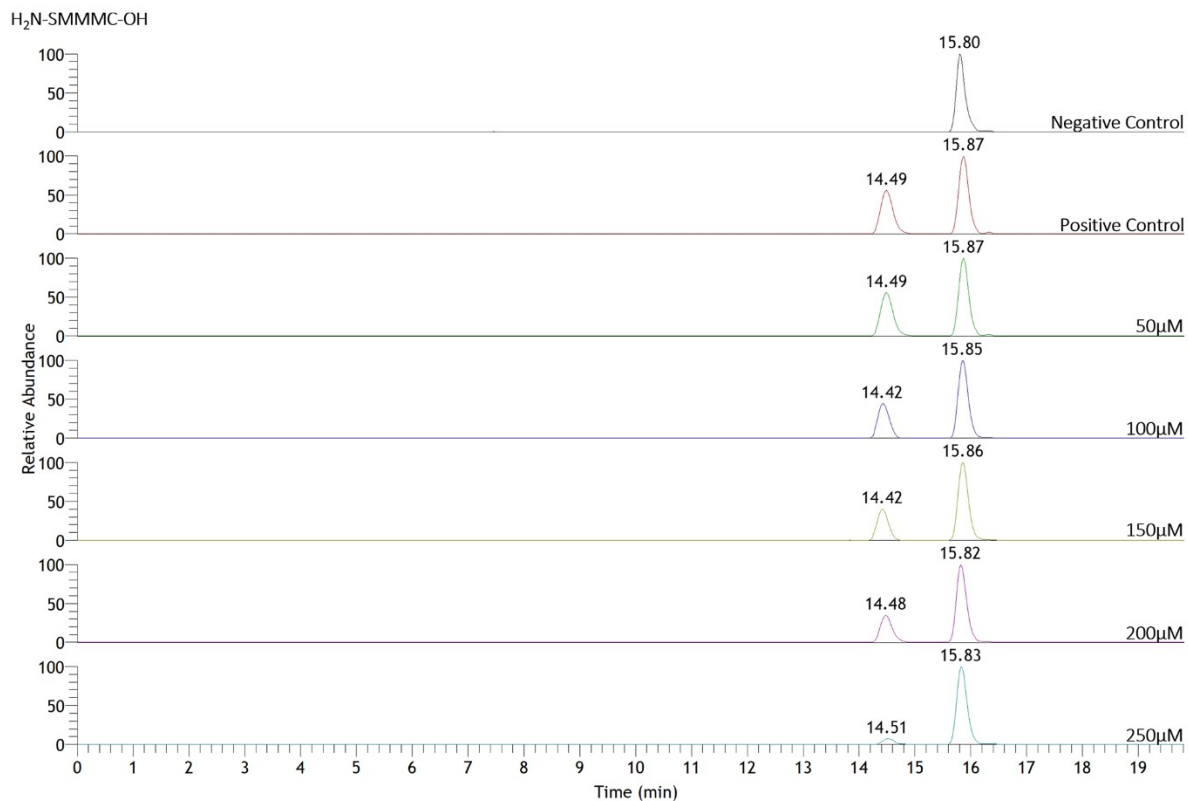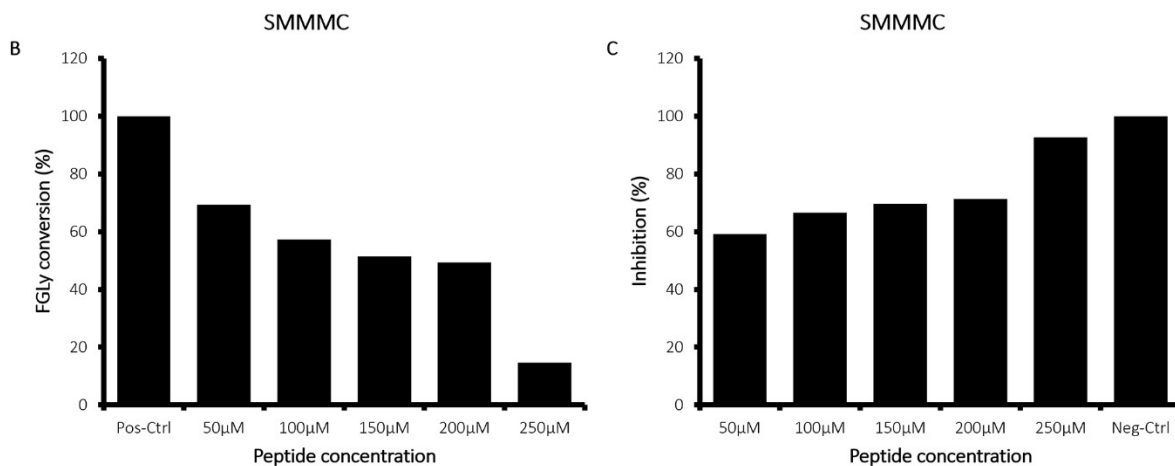

Figure S17. MS-chromatogram profile FGE activity in the presence of various SMMM concentrations. The peptide inhibitor was neither N-terminal acetylated nor C-terminal amidated and the reaction contained 200µM native enzyme substrate.

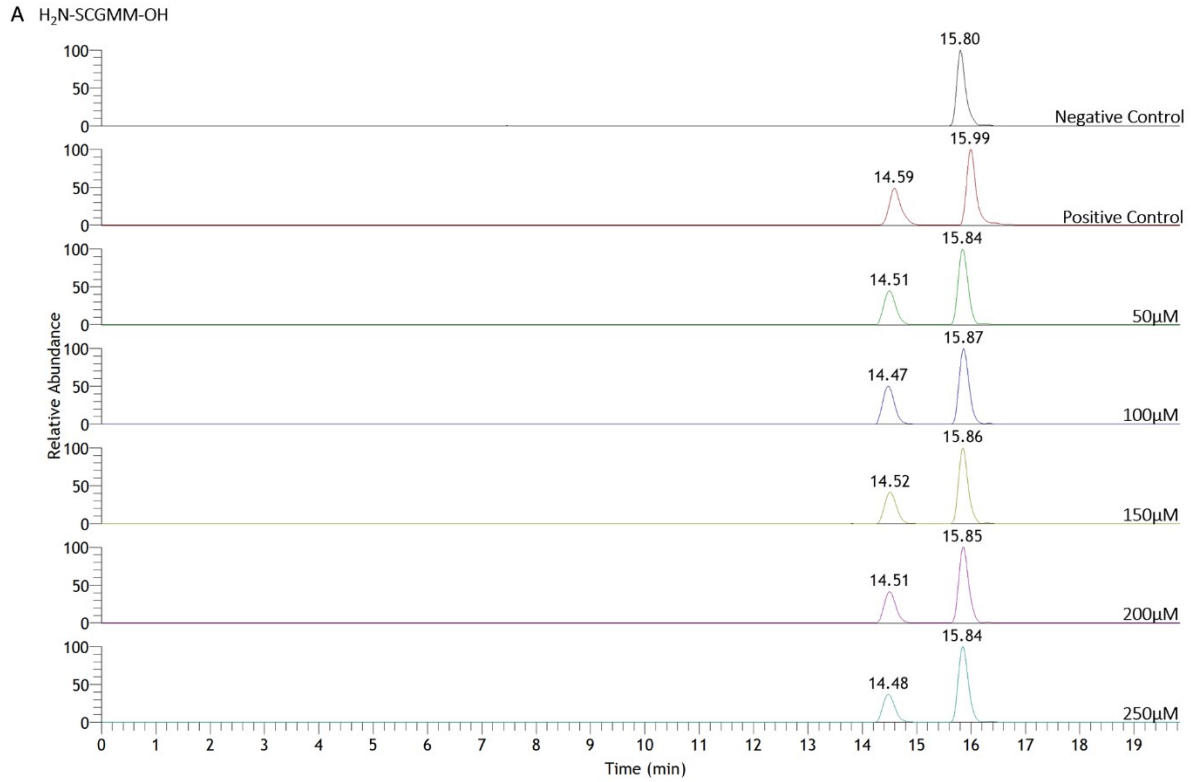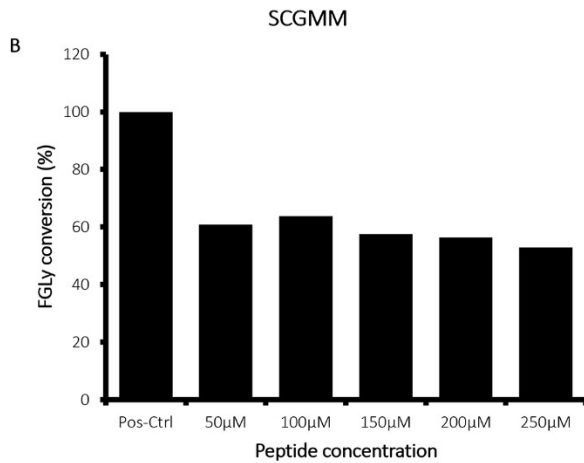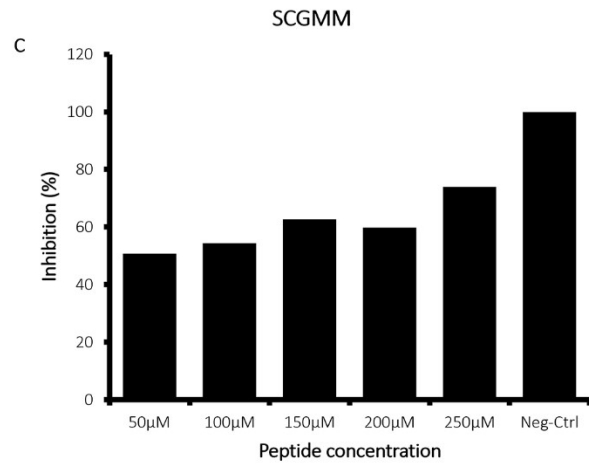

Figure S18. MS-chromatogram profile FGE activity in the presence of various SCGMM concentrations. The peptide inhibitor was neither N-terminal acetylated nor C-terminal amidated and the reaction contained 200µM native enzyme substrate.

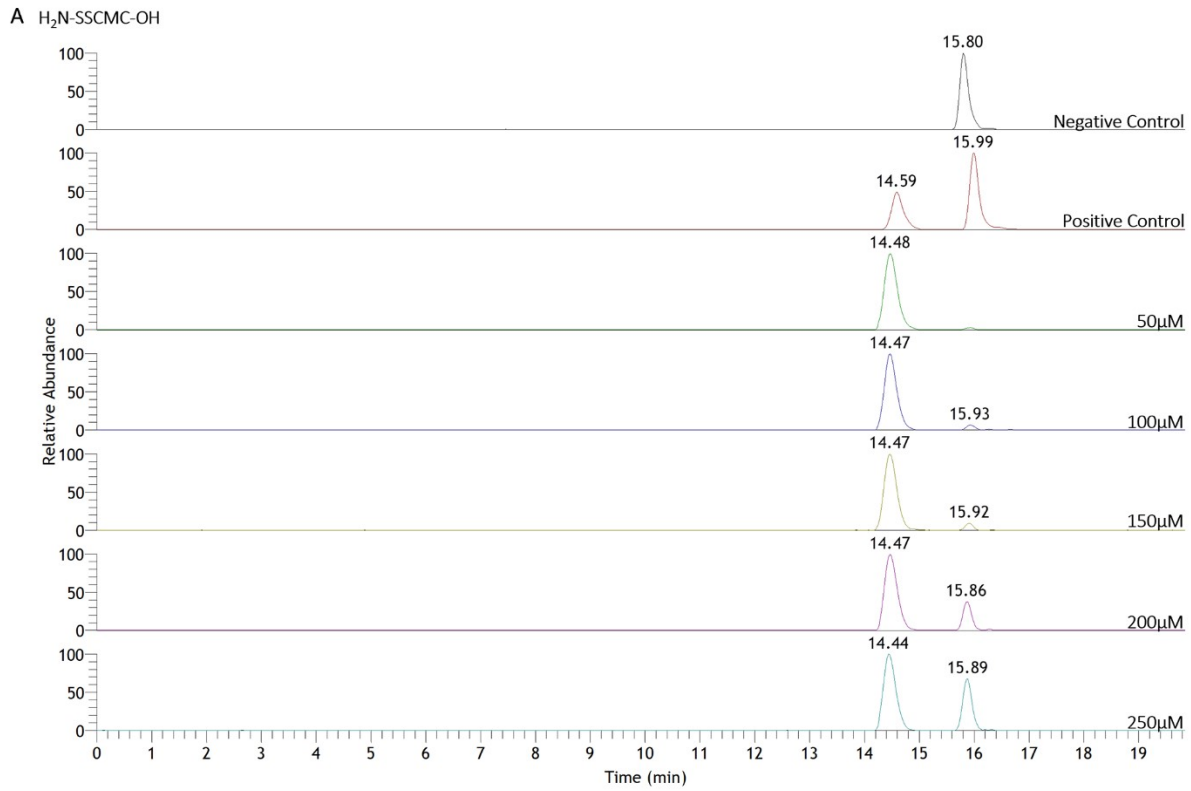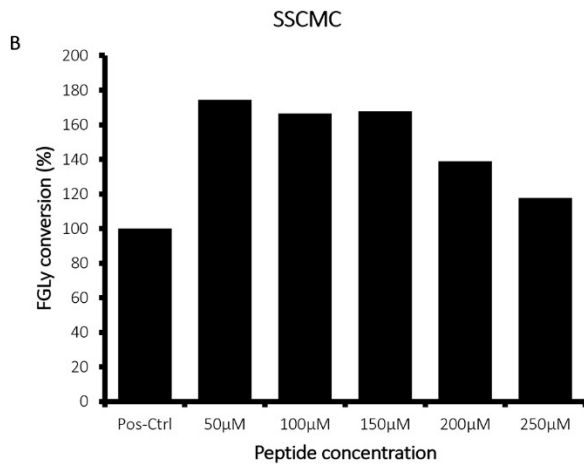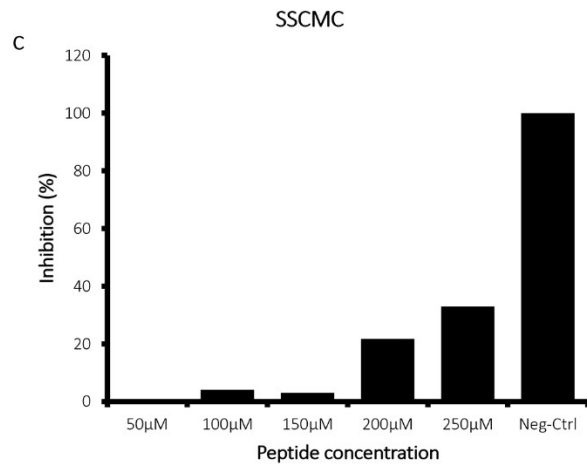

Figure S19. MS-chromatogram profile FGE activity in the presence of various SSCMC concentrations. The peptide inhibitor was neither N-terminal acetylated nor C-terminal amidated and the reaction contained 200µM native enzyme substrate.

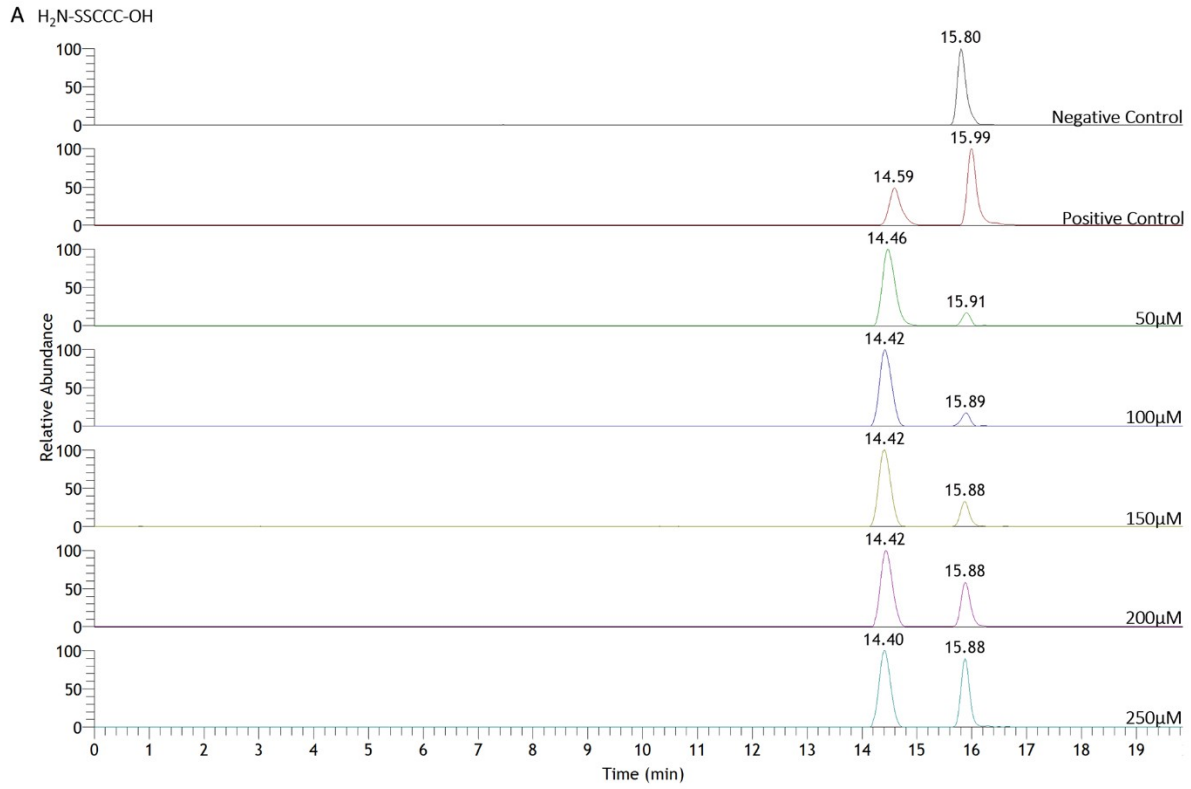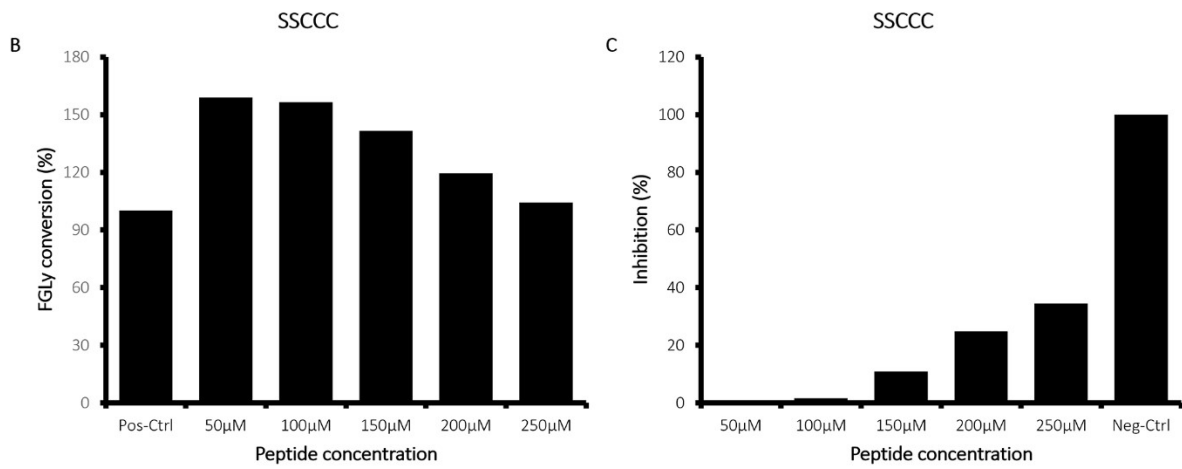

Figure S20. MS-chromatogram profile FGE activity in the presence of various SSSCC concentrations. The peptide inhibitor was neither N-terminal acetylated nor C-terminal amidated and the reaction contained 200µM native enzyme substrate.

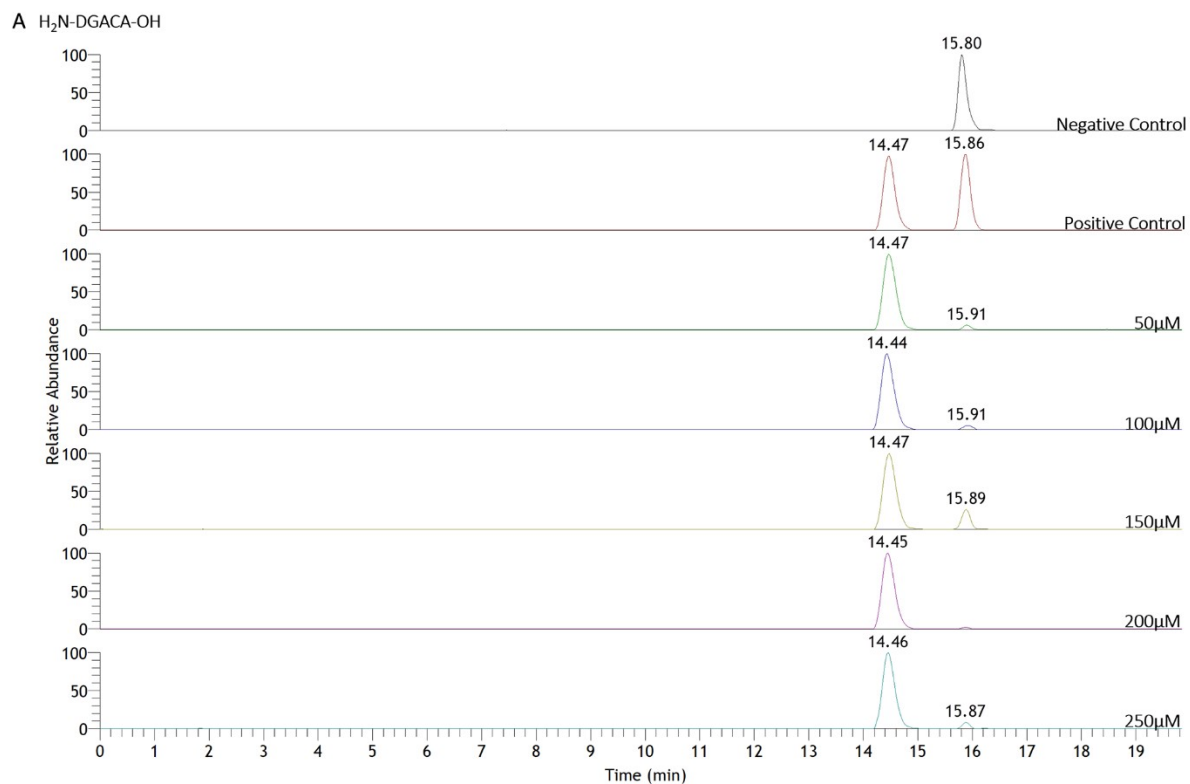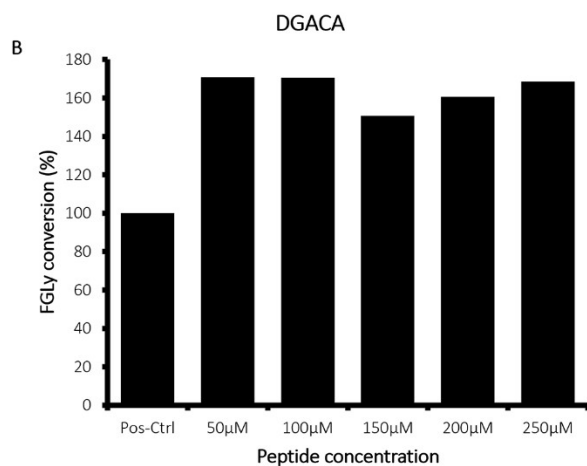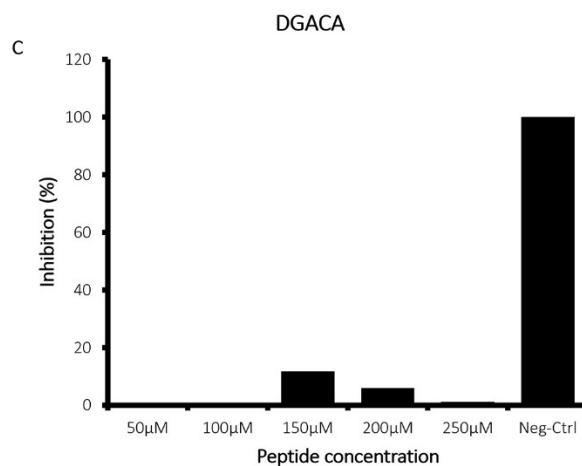

Figure S21. MS-chromatogram profile FGE activity in the presence of various DGACA concentrations. The peptide inhibitor was neither N-terminal acetylated nor C-terminal amidated and the reaction contained 200µM native enzyme substrate.

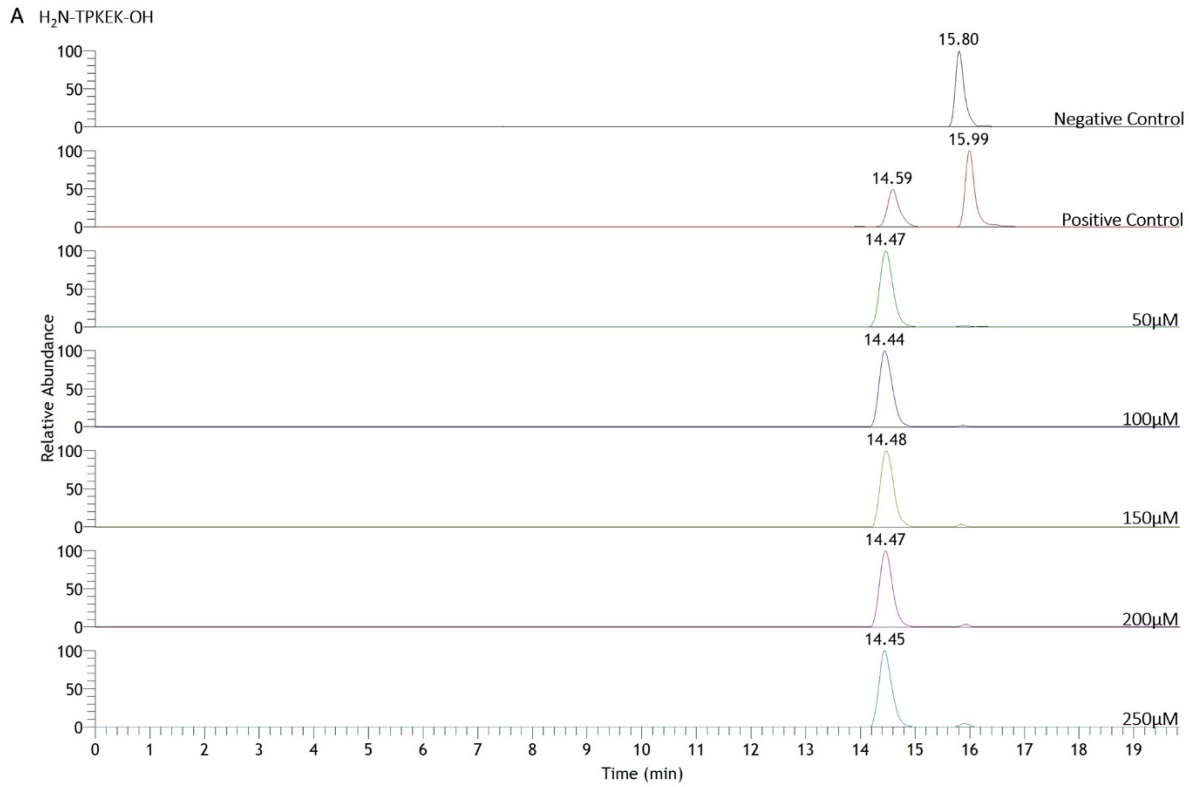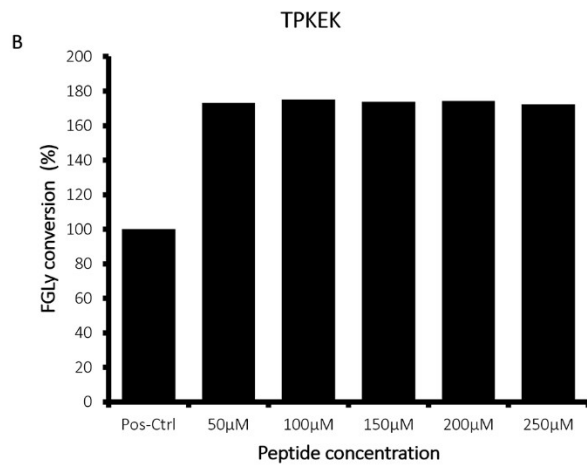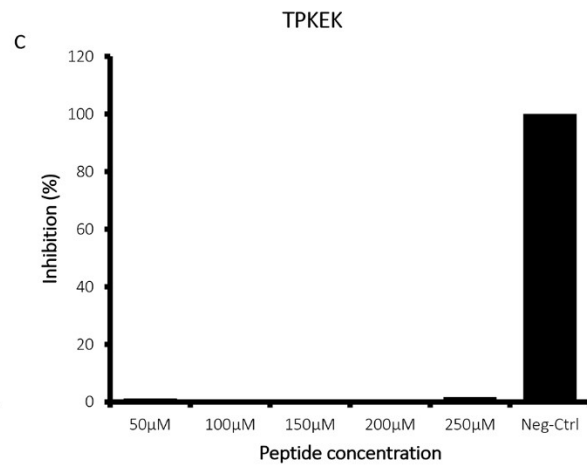

Figure S22. MS-chromatogram profile FGE activity in the presence of various TPKEK concentrations. The peptide inhibitor was neither N-terminal acetylated nor C-terminal amidated and the reaction contained 200µM native enzyme substrate.

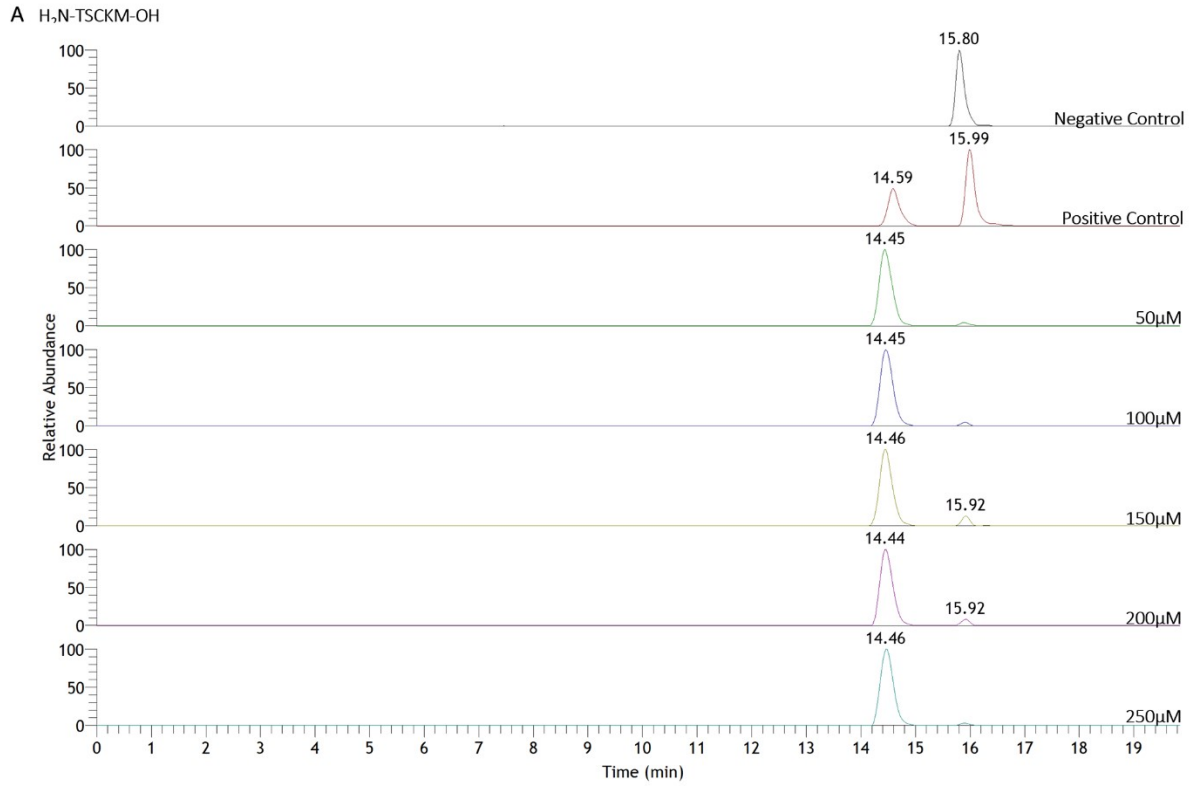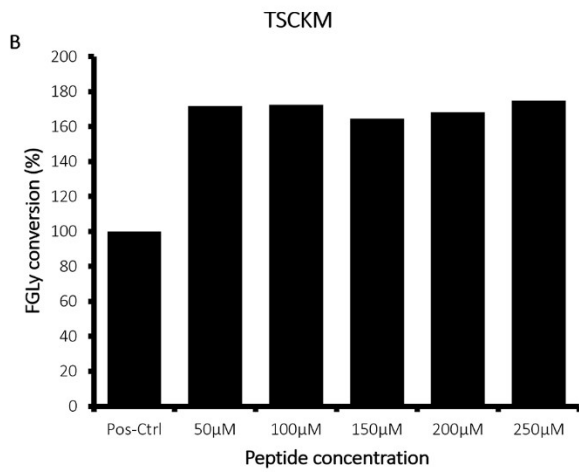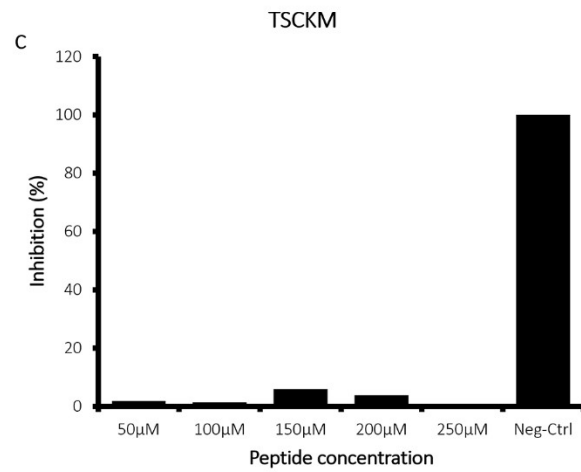

Figure S23. MS-chromatogram profile FGE activity in the presence of various TSCKM concentrations. The peptide inhibitor was neither N-terminal acetylated nor C-terminal amidated and the reaction contained 200µM native enzyme substrate.
